# Supplementary material
Source: Springer Nature journal article supplement (https://www.springermedizin.de/resource/supplementary/12885_2011_3020_MOESM6_ESM.pdf/9462640)

**A.**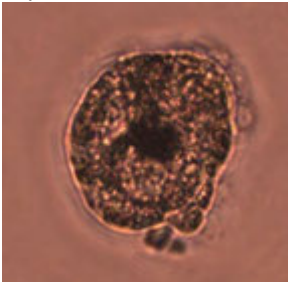**B.**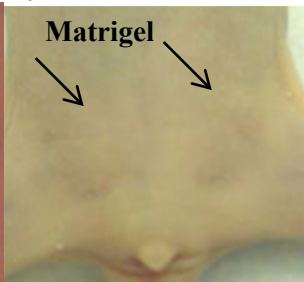**C.**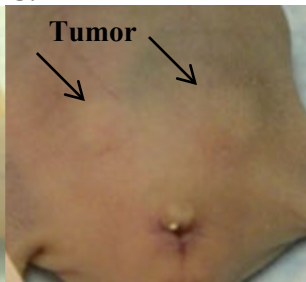**D.**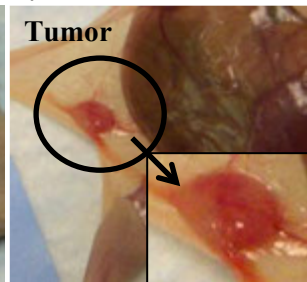

Supplement: MOESM6 [file 9462640]
